# Supplementary material
Source: PubMed Central journal article supplement (PMC7094628)
Supplement: mmc1.pdf [file mmc1.pdf]

King Saud University Medical City  
Infection Control Department

RESPIRATORY ILLNESS SCREENING TOOL

**RESPIRATORY ILLNESS SCREENING TOOL**

Name: \_\_\_\_\_

File No.: \_\_\_\_\_

|                                                                                                                            |                                  |                                 |
|----------------------------------------------------------------------------------------------------------------------------|----------------------------------|---------------------------------|
| Do you feel <b>feverish or had chills/rigors</b> in the last 3 days?                                                       | <input type="checkbox"/> Yes (2) | <input type="checkbox"/> No (0) |
| Do you have a new or worsening <b>cough</b> ?                                                                              | <input type="checkbox"/> Yes (2) | <input type="checkbox"/> No (0) |
| Do you currently have <b>runny nose</b> ?                                                                                  | <input type="checkbox"/> Yes (1) | <input type="checkbox"/> No (0) |
| Do you currently have <b>sore throat</b> ?                                                                                 | <input type="checkbox"/> Yes (1) | <input type="checkbox"/> No (0) |
| Are you having <b>difficulty breathing</b> ?                                                                               | <input type="checkbox"/> Yes (2) | <input type="checkbox"/> No (0) |
| Did you have <b>nausea or vomiting or diarrhea</b> ?                                                                       | <input type="checkbox"/> Yes (1) | <input type="checkbox"/> No (0) |
| Did you have <b>body aches</b> ?                                                                                           | <input type="checkbox"/> Yes (2) | <input type="checkbox"/> No (0) |
| Did you visit a camel farm, deal with camels or drink camel milk/mil-products within the last 14 days?                     | <input type="checkbox"/> Yes (1) | <input type="checkbox"/> No (0) |
| Have you been in <b>contact with a confirmed case</b> of MERS-COV within the 2 last weeks?                                 | <input type="checkbox"/> Yes (3) | <input type="checkbox"/> No (0) |
| Have you travelled or performed <b>Umrah/Hajj</b> in the last two (2) weeks?                                               | <input type="checkbox"/> Yes (2) | <input type="checkbox"/> No (0) |
| Have you visited <b>any health care setting to receive treatment</b> within the last 2 weeks? If yes, name of the hospital | <input type="checkbox"/> Yes (3) | <input type="checkbox"/> No (0) |

**Total Score:** \_\_\_\_\_

If RIST Score is  $\geq 3$ , then:

- MERS-COV must be performed
- If MERS-COV was performed:
  - Negative
  - Positive

**In case of Emergency procedure (primary Or Rescue PCI) then follow emergency pathway**

**Other Notes:**

\_\_\_\_\_

\_\_\_\_\_

**Physician Name and Signature :**
